# Supplementary material for: Soundscape manipulation enhances larval recruitment of a reef-building mollusk
Source: PeerJ. 2015 Jun 4;3:e999. doi: 10.7717/peerj.999 (PMC4458132; doi:10.7717/peerj.999)
Supplement: Supplemental Information 1 [file peerj-03-999-s001.xlsx]

## Sheet: Spat counts
Trial #	Retrieval Date	Treatment	Replicate	Spat count
1	2012-07-16	Sound replay	1	4
1	2012-07-16	Sound replay	2	0
1	2012-07-16	Sound replay	3	7
1	2012-07-16	Sound replay	4	1
1	2012-07-16	Sound replay	5	1
1	2012-07-16	No sound	1	2
1	2012-07-16	No sound	2	1
1	2012-07-16	No sound	3	0
1	2012-07-16	No sound	4	0
1	2012-07-16	No sound	5	0
2	2012-07-30	Sound replay	1	14
2	2012-07-30	Sound replay	2	3
2	2012-07-30	Sound replay	3	7
2	2012-07-30	Sound replay	4	7
2	2012-07-30	Sound replay	5	5
2	2012-07-30	Sound replay	6	7
2	2012-07-30	No sound	1	4
2	2012-07-30	No sound	2	2
2	2012-07-30	No sound	3	2
2	2012-07-30	No sound	4	5
2	2012-07-30	No sound	5	4
2	2012-07-30	No sound	6	3
3	2012-08-03	Sound replay	1	1
3	2012-08-03	Sound replay	2	1
3	2012-08-03	Sound replay	3	0
3	2012-08-03	Sound replay	4	6
3	2012-08-03	Sound replay	5	1
3	2012-08-03	No sound	1	0
3	2012-08-03	No sound	2	0
3	2012-08-03	No sound	3	0
3	2012-08-03	No sound	4	0
3	2012-08-03	No sound	5	0
4	2012-08-06	Sound replay	1	3
4	2012-08-06	Sound replay	2	0
4	2012-08-06	Sound replay	3	6
4	2012-08-06	Sound replay	4	13
4	2012-08-06	Sound replay	5	0
4	2012-08-06	Sound replay	6	2
4	2012-08-06	No sound	1	0
4	2012-08-06	No sound	2	0
4	2012-08-06	No sound	3	0
4	2012-08-06	No sound	4	0
4	2012-08-06	No sound	5	0
4	2012-08-06	No sound	6	0
5	2012-08-09	Sound replay	1	9
5	2012-08-09	Sound replay	2	3
5	2012-08-09	Sound replay	3	2
5	2012-08-09	Sound replay	4	2
5	2012-08-09	Sound replay	5	2
5	2012-08-09	Sound replay	6	2
5	2012-08-09	No sound	1	2
5	2012-08-09	No sound	2	3
5	2012-08-09	No sound	3	1
5	2012-08-09	No sound	4	1
5	2012-08-09	No sound	5	2
5	2012-08-09	No sound	6	0
6	2012-08-15	Sound replay	1	72
6	2012-08-15	Sound replay	2	67
6	2012-08-15	Sound replay	3	58
6	2012-08-15	Sound replay	4	73
6	2012-08-15	Sound replay	5	32
6	2012-08-15	No sound	1	11
6	2012-08-15	No sound	2	16
6	2012-08-15	No sound	3	10
6	2012-08-15	No sound	4	10
6	2012-08-15	No sound	5	11
7	2012-08-27	Sound replay	1	46
7	2012-08-27	Sound replay	2	31
7	2012-08-27	Sound replay	3	30
7	2012-08-27	Sound replay	4	46
7	2012-08-27	Sound replay	5	63
7	2012-08-27	Sound replay	6	21
7	2012-08-27	No sound	1	46
7	2012-08-27	No sound	2	50
7	2012-08-27	No sound	3	31
7	2012-08-27	No sound	4	36
7	2012-08-27	No sound	5	63
7	2012-08-27	No sound	6	41
8	2012-08-31	Sound replay	1	47
8	2012-08-31	Sound replay	2	82
8	2012-08-31	Sound replay	3	51
8	2012-08-31	Sound replay	4	63
8	2012-08-31	Sound replay	5	45
8	2012-08-31	Sound replay	6	45
8	2012-08-31	No sound	1	47
8	2012-08-31	No sound	2	47
8	2012-08-31	No sound	3	115
8	2012-08-31	No sound	4	44
8	2012-08-31	No sound	5	81
8	2012-08-31	No sound	6	15

## Sheet: Summary
Trial	Retrieval Date	Treatment	Site	SPL (rms dB)	Mean recruitment per collector	Proportion of trial recruitment
1	2012-07-16	Sound replay	2	132.4	2.6	0.756757
1	2012-07-16	No Sound	1	113.5	0.6	0.243243
2	2012-07-30	Sound replay	1	132.2	7.2	0.683
2	2012-07-30	No Sound	2	n/a	3.3	0.317
3	2012-08-03	Sound replay	2	130.5	1.8	1
3	2012-08-03	No Sound	1	n/a	0	0
4	2012-08-06	Sound replay	1	n/a	4.4	1
4	2012-08-06	No Sound	2	n/a	0	0
5	2012-08-09	Sound replay	2	125.4	3.3	0.689655
5	2012-08-09	No Sound	1	n/a	1.5	0.310345
6	2012-08-15	Sound replay	1	128.9	60.4	0.855928
6	2012-08-15	No Sound	2	115.1	11.6	0.144072
7	2012-08-27	Sound replay	2	135.9	39.5	0.470238
7	2012-08-27	No Sound	1	115.9	44.5	0.529762
8	2012-08-31	Sound replay	1	127.4	55.5	0.488151
8	2012-08-31	No Sound	2	110.3	58.2	0.511849
*Mean sound levels are unavailable for several trials due to instrument inavailability or malfunction
